# Supplementary material for: MiR-181a-5p promotes osteogenesis by targeting BMP3
Source: publisher site journal article supplement (doi:10.18632/aging.204505), 2023-02-03
Supplement: Supplementary file [file aging-v15i3-204505-supplementary-material-SD1.pdf]

**SUPPLEMENTARY FIGURE**

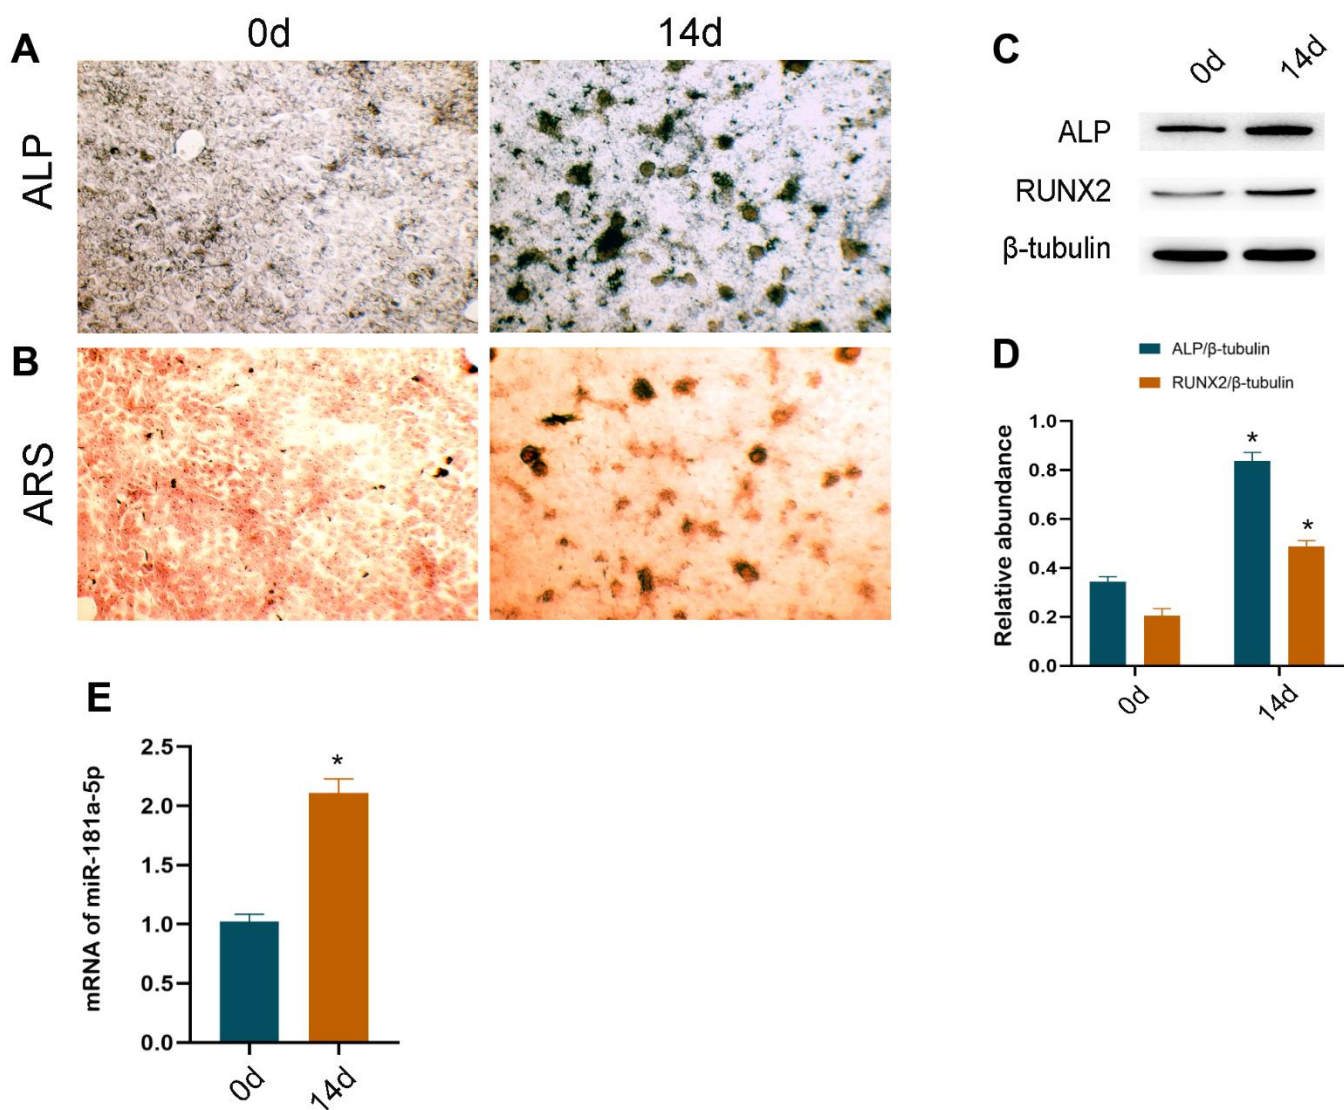

**Supplementary Figure 1. Osteogenesis induced model in MC3T3-E1 cells.** (A, B) ALP and ARS staining of MC3T3-E1 wild type cells at the start point (0 day) and end point (14 days). (C, D) ALP, RUNX2 and beta-tubulin are determined and quantified by densitometric evaluation of western blots, further normalized to beta-tubulin. (E) expression of miR-181a-5p in MC3T3-E1 cells induced for osteogenic differentiation. All data represent mean  $\pm$  s.e.m. (n = 6). \*P<0.05 compared to day 0.
